# Supplementary figures and images for: Isovitexin, a main Flavonoid Compound from Celtis Sinensis Pers. Leaves, Exerts Activity Against Inflammation caused by Contacting Ginkgolic Acids in Ginkgo Fruit through Downregulating SHP2 Activation
Source: Research Square preprint supplement (doi:10.21203/rs.3.rs-287595/v1), 2021-03-19

Raw figure


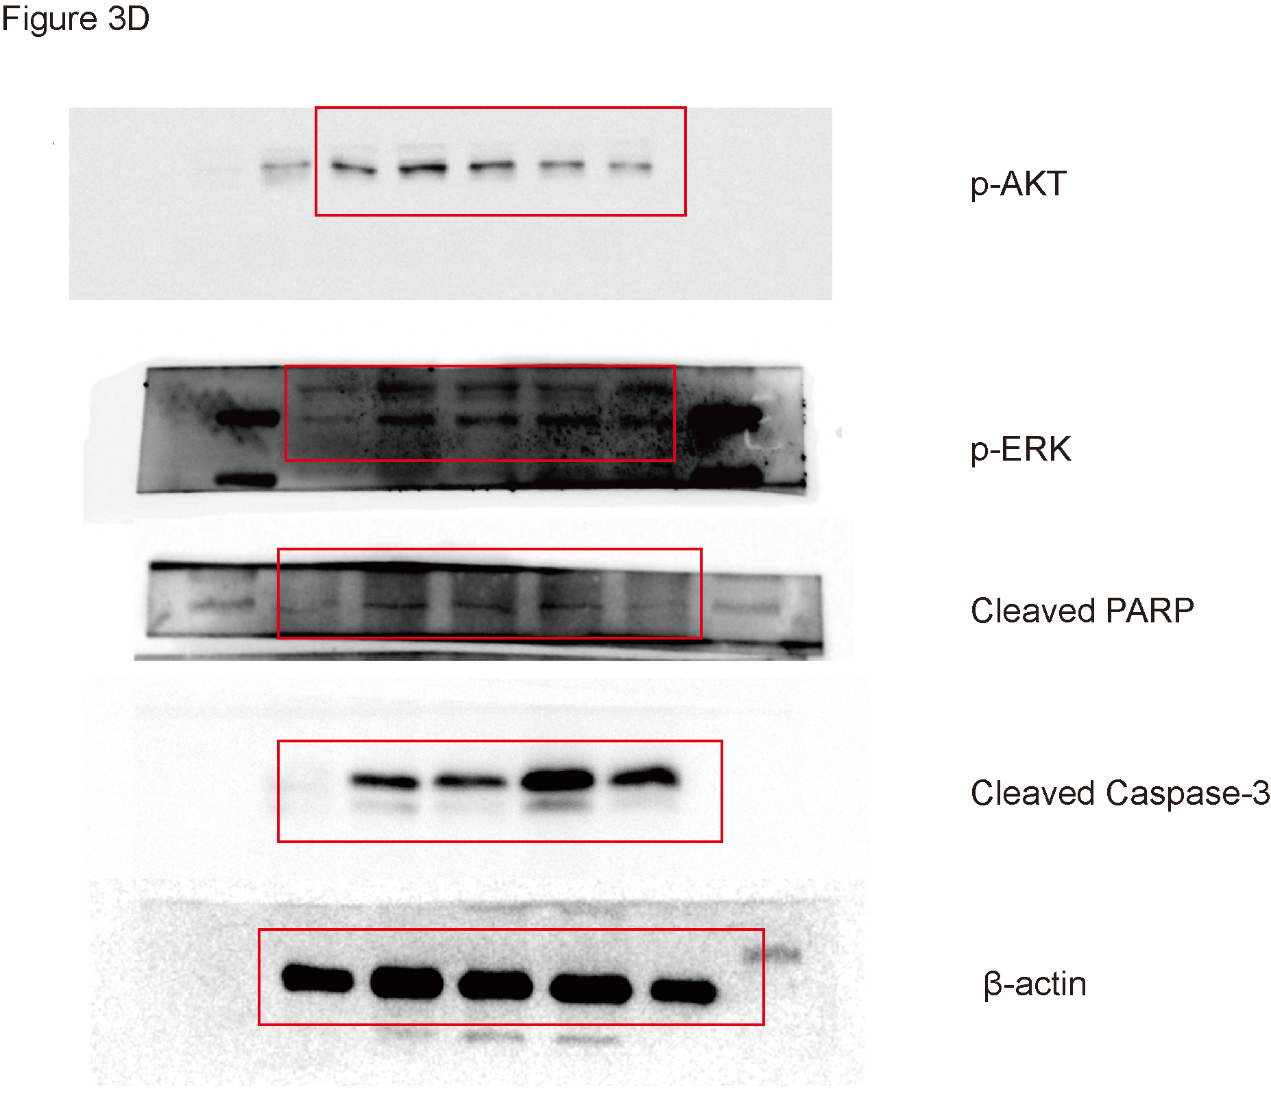

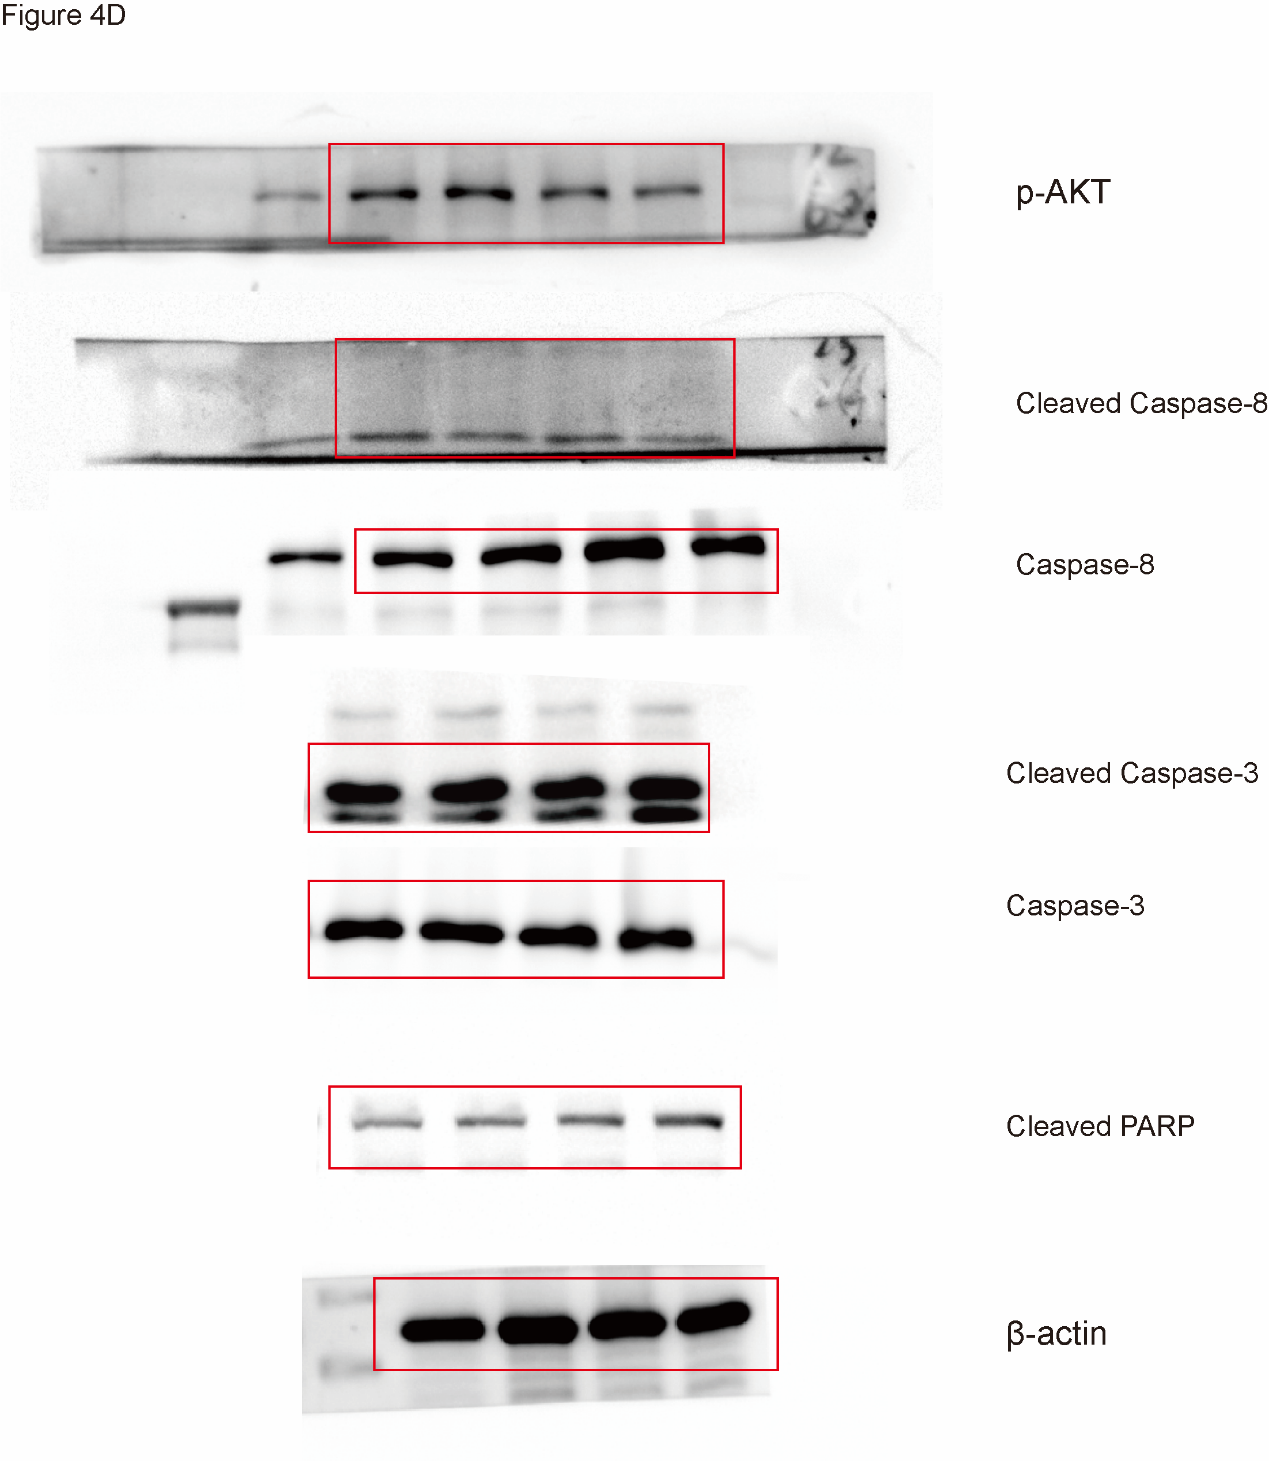

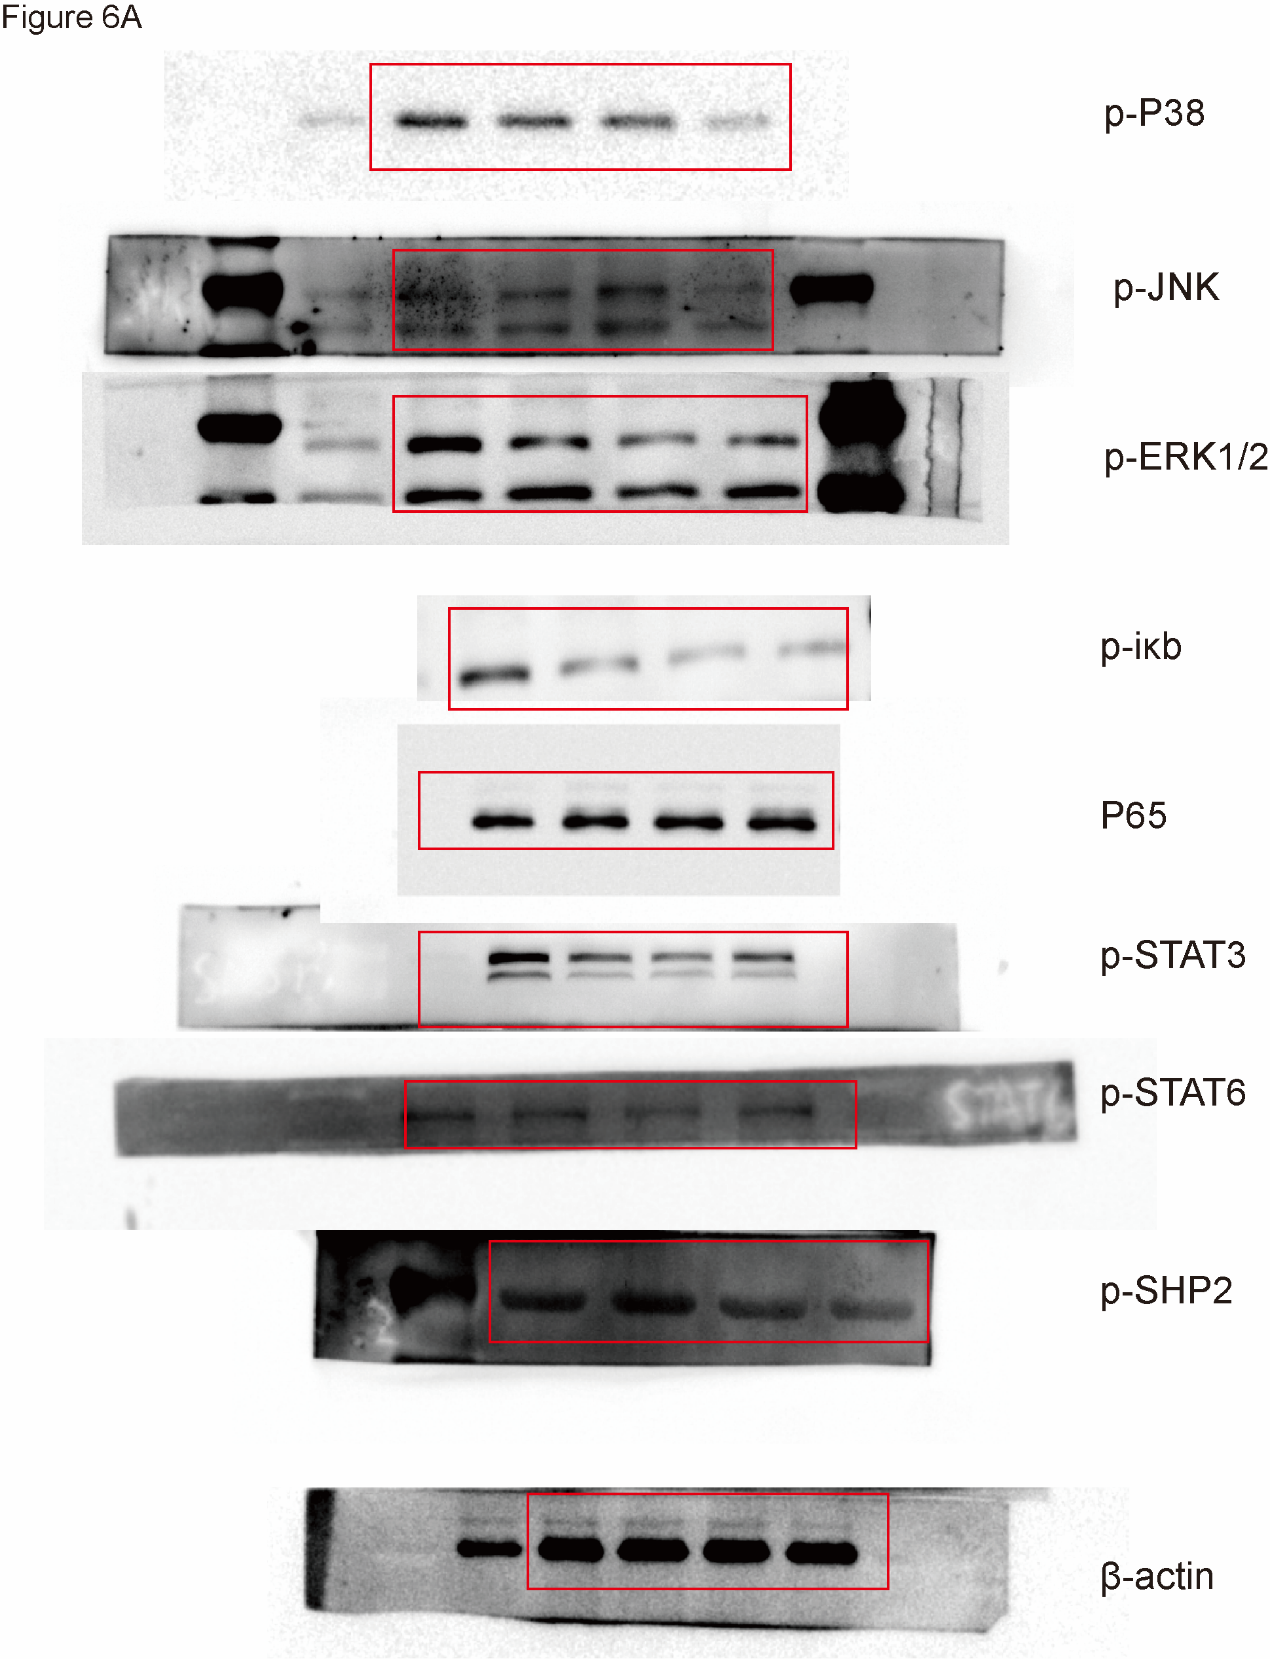

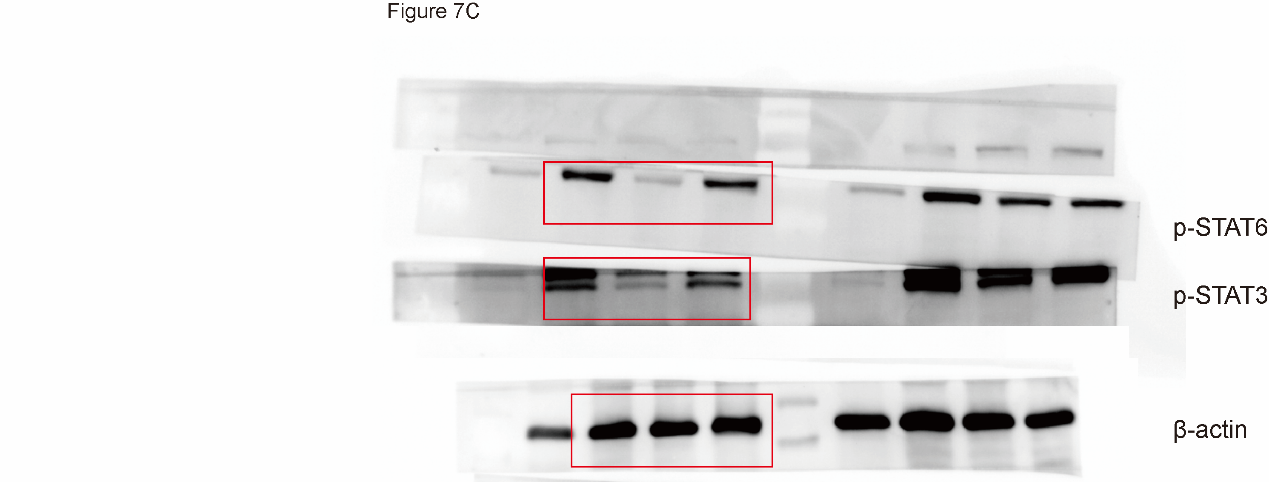

Supplement: Supplementary file 2 [file 23fbda609f55b96a8cc3d41e.docx]
